# Supplementary material for: SGLT2 Deletion Improves Glucose Homeostasis and Preserves Pancreatic β-Cell Function
Source: Oxford University Press journal article supplement (doi:10.2337/db10-1328), 2011-02-21
Supplement: db101328supplementarydata1.pdf [file db101328supplementarydata1.pdf]

SUPPLEMENTARY DATA

**Supplementary Table 1. Plasma chemistries**

|                      | Na <sup>+</sup><br>(mM) | K <sup>+</sup> (mM) | Cl <sup>-</sup><br>(mM) | Phosphate<br>(mg/dl) | BUN:Creatinine |
|----------------------|-------------------------|---------------------|-------------------------|----------------------|----------------|
| WT                   | 152±1                   | 6.68±0.17           | 121±1                   | 6.88±0.28            | 320±18         |
| SGLT2 <sup>-/-</sup> | 153±2                   | 6.23±0.38           | 121±1                   | 6.96±0.40            | 322±36         |

Samples were collected from *ad libitum* fed animals. N=3-6 per genotype for plasma electrolyte and markers of renal function. Data analyzed by unpaired Student's t-test.
